# Supplementary material
Source: Springer Nature journal article supplement (https://www.springermedizin.de/resource/supplementary/12874_2012_999_MOESM1_ESM.pdf/9433028)

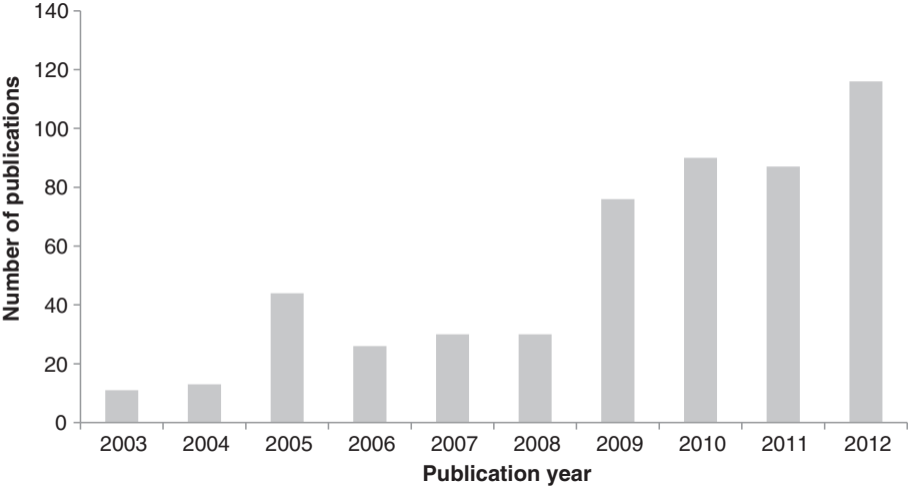

Supplement: MOESM1 [file 9433028]
